# Supplementary material for: Association between major surgical admissions and the cognitive trajectory: 19 year follow-up of Whitehall II cohort study
Source: PubMed Central journal article supplement (PMC6683971; doi:10.1136/bmj.l4466), 2019-08-07
Supplement: krab049203.ww1.pdf [file krab049203.ww1.pdf]

OPCS Surgical\_Type BUPA surgical severity rating score Emergency Surgery  
Code (NB. BUPA major are scores greater than or equal to 3)

|      |                       |   |  |
|------|-----------------------|---|--|
| K104 | cardiac_surgery       | 5 |  |
| K221 | cardiac_surgery       | 5 |  |
| K234 | cardiac_surgery       | 5 |  |
| K334 | cardiac_surgery       | 5 |  |
| K401 | cardiac_surgery       | 5 |  |
| K402 | cardiac_surgery       | 5 |  |
| K403 | cardiac_surgery       | 5 |  |
| K404 | cardiac_surgery       | 5 |  |
| K411 | cardiac_surgery       | 5 |  |
| K412 | cardiac_surgery       | 5 |  |
| K413 | cardiac_surgery       | 5 |  |
| K442 | cardiac_surgery       | 5 |  |
| K451 | cardiac_surgery       | 5 |  |
| K452 | cardiac_surgery       | 5 |  |
| K453 | cardiac_surgery       | 5 |  |
| K454 | cardiac_surgery       | 5 |  |
| K455 | cardiac_surgery       | 5 |  |
| K668 | cardiac_surgery       | 5 |  |
| K679 | cardiac_surgery       | 5 |  |
| K681 | cardiac_surgery       | 5 |  |
| K682 | cardiac_surgery       | 5 |  |
| K688 | cardiac_surgery       | 5 |  |
| K689 | cardiac_surgery       | 5 |  |
| K698 | cardiac_surgery       | 5 |  |
| L031 | cardiac_surgery       | 5 |  |
| L191 | cardiac_surgery       | 5 |  |
| L202 | cardiac_surgery       | 5 |  |
| K252 | cardiac_surgery_valve | 5 |  |
| K253 | cardiac_surgery_valve | 5 |  |
| K254 | cardiac_surgery_valve | 5 |  |
| K255 | cardiac_surgery_valve | 5 |  |
| K259 | cardiac_surgery_valve | 5 |  |
| K262 | cardiac_surgery_valve | 5 |  |
| K263 | cardiac_surgery_valve | 5 |  |
| K264 | cardiac_surgery_valve | 5 |  |
| K268 | cardiac_surgery_valve | 5 |  |
| K302 | cardiac_surgery_valve | 5 |  |
| D011 | ENT_surgery           | 2 |  |
| D012 | ENT_surgery           | 2 |  |

|      |             |   |
|------|-------------|---|
| D021 | ENT_surgery | 2 |
| D034 | ENT_surgery | 2 |
| D041 | ENT_surgery | 2 |
| D063 | ENT_surgery | 4 |
| D078 | ENT_surgery | 2 |
| D102 | ENT_surgery | 4 |
| D103 | ENT_surgery | 4 |
| D104 | ENT_surgery | 4 |
| D105 | ENT_surgery | 4 |
| D106 | ENT_surgery | 4 |
| D121 | ENT_surgery | 4 |
| D122 | ENT_surgery | 4 |
| D124 | ENT_surgery | 4 |
| D128 | ENT_surgery | 4 |
| D132 | ENT_surgery | 3 |
| D141 | ENT_surgery | 3 |
| D142 | ENT_surgery | 3 |
| D148 | ENT_surgery | 3 |
| D151 | ENT_surgery | 3 |
| D152 | ENT_surgery | 3 |
| D153 | ENT_surgery | 3 |
| D171 | ENT_surgery | 3 |
| D172 | ENT_surgery | 3 |
| D241 | ENT_surgery | 3 |
| D282 | ENT_surgery | 3 |
| D288 | ENT_surgery | 2 |
| E024 | ENT_surgery | 2 |
| E031 | ENT_surgery | 2 |
| E036 | ENT_surgery | 2 |
| E038 | ENT_surgery | 2 |
| E041 | ENT_surgery | 2 |
| E042 | ENT_surgery | 2 |
| E048 | ENT_surgery | 2 |
| E051 | ENT_surgery | 2 |
| E052 | ENT_surgery | 2 |
| E058 | ENT_surgery | 2 |
| E061 | ENT_surgery | 1 |
| E062 | ENT_surgery | 1 |
| E063 | ENT_surgery | 2 |
| E064 | ENT_surgery | 2 |
| E068 | ENT_surgery | 1 |
| E069 | ENT_surgery | 1 |
| E081 | ENT_surgery | 2 |
| E085 | ENT_surgery | 2 |

|      |             |   |
|------|-------------|---|
| E091 | ENT_surgery | 1 |
| E093 | ENT_surgery | 1 |
| E094 | ENT_surgery | 1 |
| E098 | ENT_surgery | 1 |
| E101 | ENT_surgery | 1 |
| E133 | ENT_surgery | 2 |
| E134 | ENT_surgery | 2 |
| E135 | ENT_surgery | 2 |
| E136 | ENT_surgery | 2 |
| E141 | ENT_surgery | 4 |
| E142 | ENT_surgery | 4 |
| E144 | ENT_surgery | 4 |
| E149 | ENT_surgery | 4 |
| E151 | ENT_surgery | 4 |
| E158 | ENT_surgery | 4 |
| E173 | ENT_surgery | 4 |
| E178 | ENT_surgery | 4 |
| E179 | ENT_surgery | 4 |
| E192 | ENT_surgery | 5 |
| E201 | ENT_surgery | 5 |
| E232 | ENT_surgery | 5 |
| E242 | ENT_surgery | 5 |
| E243 | ENT_surgery | 5 |
| E248 | ENT_surgery | 5 |
| E251 | ENT_surgery | 3 |
| E252 | ENT_surgery | 3 |
| E253 | ENT_surgery | 2 |
| E259 | ENT_surgery | 2 |
| E272 | ENT_surgery | 4 |
| E274 | ENT_surgery | 3 |
| E275 | ENT_surgery | 3 |
| E276 | ENT_surgery | 4 |
| E278 | ENT_surgery | 4 |
| E333 | ENT_surgery | 4 |
| E335 | ENT_surgery | 4 |
| E338 | ENT_surgery | 4 |
| E341 | ENT_surgery | 4 |
| E342 | ENT_surgery | 4 |
| E348 | ENT_surgery | 4 |
| E352 | ENT_surgery | 4 |
| E358 | ENT_surgery | 4 |
| E361 | ENT_surgery | 4 |
| E368 | ENT_surgery | 4 |
| E369 | ENT_surgery | 4 |

|      |             |   |
|------|-------------|---|
| E371 | ENT_surgery | 4 |
| E381 | ENT_surgery | 4 |
| E401 | ENT_surgery | 4 |
| E423 | ENT_surgery | 4 |
| E424 | ENT_surgery | 4 |
| E426 | ENT_surgery | 4 |
| E427 | ENT_surgery | 4 |
| E438 | ENT_surgery | 3 |
| E659 | ENT_surgery | 2 |
| F021 | ENT_surgery | 1 |
| F053 | ENT_surgery | 1 |
| F062 | ENT_surgery | 1 |
| F091 | ENT_surgery | 1 |
| F094 | ENT_surgery | 1 |
| F231 | ENT_surgery | 3 |
| F241 | ENT_surgery | 3 |
| F265 | ENT_surgery | 2 |
| F281 | ENT_surgery | 4 |
| F324 | ENT_surgery | 4 |
| F328 | ENT_surgery | 4 |
| F341 | ENT_surgery | 4 |
| F344 | ENT_surgery | 4 |
| F347 | ENT_surgery | 4 |
| F348 | ENT_surgery | 4 |
| F349 | ENT_surgery | 4 |
| F362 | ENT_surgery | 4 |
| F363 | ENT_surgery | 3 |
| F381 | ENT_surgery | 3 |
| F382 | ENT_surgery | 3 |
| F392 | ENT_surgery | 4 |
| F421 | ENT_surgery | 2 |
| F428 | ENT_surgery | 2 |
| F441 | ENT_surgery | 4 |
| F442 | ENT_surgery | 4 |
| F443 | ENT_surgery | 4 |
| F444 | ENT_surgery | 4 |
| F451 | ENT_surgery | 4 |
| F452 | ENT_surgery | 4 |
| F461 | ENT_surgery | 4 |
| F468 | ENT_surgery | 4 |
| F481 | ENT_surgery | 2 |
| F488 | ENT_surgery | 2 |
| F512 | ENT_surgery | 2 |
| F633 | ENT_surgery | 2 |

|      |                 |   |
|------|-----------------|---|
| B081 | general_surgery | 3 |
| B082 | general_surgery | 3 |
| B083 | general_surgery | 3 |
| B084 | general_surgery | 3 |
| B085 | general_surgery | 3 |
| B086 | general_surgery | 3 |
| B089 | general_surgery | 3 |
| B101 | general_surgery | 3 |
| B122 | general_surgery | 3 |
| B128 | general_surgery | 3 |
| B144 | general_surgery | 3 |
| B145 | general_surgery | 3 |
| B149 | general_surgery | 3 |
| B163 | general_surgery | 3 |
| B181 | general_surgery | 5 |
| B201 | general_surgery | 5 |
| B223 | general_surgery | 5 |
| B252 | general_surgery | 4 |
| B272 | general_surgery | 4 |
| B273 | general_surgery | 4 |
| B274 | general_surgery | 4 |
| B275 | general_surgery | 4 |
| B276 | general_surgery | 4 |
| B278 | general_surgery | 4 |
| B279 | general_surgery | 4 |
| B281 | general_surgery | 4 |
| B282 | general_surgery | 4 |
| B283 | general_surgery | 4 |
| B284 | general_surgery | 4 |
| B285 | general_surgery | 4 |
| B287 | general_surgery | 4 |
| B288 | general_surgery | 4 |
| B298 | general_surgery | 4 |
| B301 | general_surgery | 4 |
| B302 | general_surgery | 4 |
| B303 | general_surgery | 4 |
| B304 | general_surgery | 4 |
| B311 | general_surgery | 4 |
| B318 | general_surgery | 4 |
| B321 | general_surgery | 2 |
| B322 | general_surgery | 2 |
| B328 | general_surgery | 2 |
| B329 | general_surgery | 2 |
| B331 | general_surgery | 2 |

|      |                 |   |
|------|-----------------|---|
| B332 | general_surgery | 2 |
| B342 | general_surgery | 2 |
| B354 | general_surgery | 2 |
| B358 | general_surgery | 2 |
| B361 | general_surgery | 2 |
| B374 | general_surgery | 3 |
| B375 | general_surgery | 3 |
| G011 | general_surgery | 5 |
| G013 | general_surgery | 5 |
| G029 | general_surgery | 5 |
| G031 | general_surgery | 5 |
| G039 | general_surgery | 5 |
| G091 | general_surgery | 4 |
| G144 | general_surgery | 2 |
| G151 | general_surgery | 2 |
| G152 | general_surgery | 2 |
| G153 | general_surgery | 2 |
| G154 | general_surgery | 2 |
| G156 | general_surgery | 2 |
| G157 | general_surgery | 2 |
| G158 | general_surgery | 2 |
| G169 | general_surgery | 2 |
| G184 | general_surgery | 3 |
| G199 | general_surgery | 3 |
| G211 | general_surgery | 2 |
| G214 | general_surgery | 2 |
| G215 | general_surgery | 2 |
| G232 | general_surgery | 5 |
| G233 | general_surgery | 5 |
| G241 | general_surgery | 5 |
| G243 | general_surgery | 5 |
| G275 | general_surgery | 5 |
| G278 | general_surgery | 5 |
| G279 | general_surgery | 5 |
| G281 | general_surgery | 5 |
| G283 | general_surgery | 5 |
| G285 | general_surgery | 5 |
| G292 | general_surgery | 5 |
| G308 | general_surgery | 5 |
| G321 | general_surgery | 5 |
| G331 | general_surgery | 5 |
| G334 | general_surgery | 4 |
| G341 | general_surgery | 3 |
| G342 | general_surgery | 3 |

|      |                 |   |
|------|-----------------|---|
| G344 | general_surgery | 3 |
| G345 | general_surgery | 2 |
| G351 | general_surgery | 5 |
| G352 | general_surgery | 5 |
| G387 | general_surgery | 4 |
| G433 | general_surgery | 3 |
| G434 | general_surgery | 3 |
| G435 | general_surgery | 3 |
| G436 | general_surgery | 3 |
| G437 | general_surgery | 3 |
| G438 | general_surgery | 3 |
| G441 | general_surgery | 3 |
| G442 | general_surgery | 3 |
| G443 | general_surgery | 3 |
| G445 | general_surgery | 3 |
| G446 | general_surgery | 3 |
| G448 | general_surgery | 3 |
| G449 | general_surgery | 3 |
| G451 | general_surgery | 3 |
| G452 | general_surgery | 3 |
| G458 | general_surgery | 3 |
| G459 | general_surgery | 3 |
| G478 | general_surgery | 3 |
| G521 | general_surgery | 5 |
| G522 | general_surgery | 5 |
| G523 | general_surgery | 5 |
| G532 | general_surgery | 5 |
| G543 | general_surgery | 4 |
| G584 | general_surgery | 5 |
| G601 | general_surgery | 3 |
| G608 | general_surgery | 5 |
| G612 | general_surgery | 5 |
| G693 | general_surgery | 5 |
| G694 | general_surgery | 5 |
| G698 | general_surgery | 5 |
| G699 | general_surgery | 5 |
| G701 | general_surgery | 4 |
| G702 | general_surgery | 5 |
| G715 | general_surgery | 5 |
| G722 | general_surgery | 5 |
| G725 | general_surgery | 5 |
| G734 | general_surgery | 5 |
| G738 | general_surgery | 5 |
| G742 | general_surgery | 5 |

|      |                 |   |           |
|------|-----------------|---|-----------|
| G743 | general_surgery | 5 |           |
| G748 | general_surgery | 5 |           |
| G749 | general_surgery | 5 |           |
| G751 | general_surgery | 4 |           |
| G753 | general_surgery | 4 |           |
| G758 | general_surgery | 4 |           |
| G763 | general_surgery | 5 |           |
| G784 | general_surgery | 4 |           |
| G788 | general_surgery | 4 |           |
| G802 | general_surgery | 1 |           |
| G803 | general_surgery | 1 |           |
| H011 | general_surgery | 3 | emergency |
| H012 | general_surgery | 3 | emergency |
| H013 | general_surgery | 3 | emergency |
| H019 | general_surgery | 3 | emergency |
| H021 | general_surgery | 3 |           |
| H024 | general_surgery | 3 |           |
| H028 | general_surgery | 3 |           |
| H029 | general_surgery | 3 |           |
| H031 | general_surgery | 3 |           |
| H041 | general_surgery | 5 |           |
| H051 | general_surgery | 5 |           |
| H053 | general_surgery | 5 |           |
| H061 | general_surgery | 4 |           |
| H062 | general_surgery | 4 |           |
| H068 | general_surgery | 4 |           |
| H069 | general_surgery | 4 |           |
| H071 | general_surgery | 4 |           |
| H072 | general_surgery | 4 |           |
| H073 | general_surgery | 4 |           |
| H074 | general_surgery | 4 |           |
| H075 | general_surgery | 4 |           |
| H078 | general_surgery | 4 |           |
| H079 | general_surgery | 4 |           |
| H083 | general_surgery | 4 |           |
| H084 | general_surgery | 4 |           |
| H091 | general_surgery | 4 |           |
| H092 | general_surgery | 4 |           |
| H093 | general_surgery | 4 |           |
| H094 | general_surgery | 4 |           |
| H095 | general_surgery | 4 |           |
| H099 | general_surgery | 4 |           |
| H101 | general_surgery | 4 |           |
| H102 | general_surgery | 4 |           |



|      |                 |   |
|------|-----------------|---|
| H103 | general_surgery | 4 |
| H104 | general_surgery | 4 |
| H105 | general_surgery | 4 |
| H109 | general_surgery | 4 |
| H112 | general_surgery | 4 |
| H114 | general_surgery | 4 |
| H115 | general_surgery | 4 |
| H119 | general_surgery | 4 |
| H122 | general_surgery | 4 |
| H151 | general_surgery | 4 |
| H152 | general_surgery | 4 |
| H153 | general_surgery | 4 |
| H154 | general_surgery | 3 |
| H157 | general_surgery | 4 |
| H201 | general_surgery | 2 |
| H202 | general_surgery | 2 |
| H206 | general_surgery | 2 |
| H208 | general_surgery | 2 |
| H214 | general_surgery | 2 |
| H221 | general_surgery | 2 |
| H228 | general_surgery | 2 |
| H229 | general_surgery | 2 |
| H231 | general_surgery | 2 |
| H232 | general_surgery | 2 |
| H233 | general_surgery | 2 |
| H238 | general_surgery | 2 |
| H239 | general_surgery | 2 |
| H243 | general_surgery | 2 |
| H251 | general_surgery | 2 |
| H259 | general_surgery | 2 |
| H262 | general_surgery | 2 |
| H278 | general_surgery | 2 |
| H281 | general_surgery | 2 |
| H289 | general_surgery | 2 |
| H298 | general_surgery | 4 |
| H331 | general_surgery | 4 |
| H332 | general_surgery | 4 |
| H333 | general_surgery | 4 |
| H334 | general_surgery | 4 |
| H335 | general_surgery | 4 |
| H336 | general_surgery | 3 |
| H338 | general_surgery | 3 |
| H354 | general_surgery | 3 |
| H361 | general_surgery | 3 |

|      |                 |   |
|------|-----------------|---|
| H368 | general_surgery | 3 |
| H402 | general_surgery | 2 |
| H411 | general_surgery | 3 |
| H412 | general_surgery | 2 |
| H413 | general_surgery | 2 |
| H414 | general_surgery | 3 |
| H426 | general_surgery | 3 |
| H441 | general_surgery | 2 |
| H443 | general_surgery | 2 |
| H444 | general_surgery | 1 |
| H448 | general_surgery | 1 |
| H481 | general_surgery | 1 |
| H482 | general_surgery | 1 |
| H498 | general_surgery | 1 |
| H511 | general_surgery | 2 |
| H513 | general_surgery | 2 |
| H519 | general_surgery | 2 |
| H523 | general_surgery | 2 |
| H524 | general_surgery | 2 |
| H528 | general_surgery | 2 |
| H538 | general_surgery | 2 |
| H541 | general_surgery | 1 |
| H548 | general_surgery | 2 |
| H551 | general_surgery | 2 |
| H553 | general_surgery | 2 |
| H554 | general_surgery | 2 |
| H558 | general_surgery | 2 |
| H561 | general_surgery | 1 |
| H562 | general_surgery | 1 |
| H564 | general_surgery | 1 |
| H568 | general_surgery | 1 |
| H569 | general_surgery | 1 |
| H581 | general_surgery | 2 |
| H582 | general_surgery | 3 |
| H602 | general_surgery | 3 |
| H625 | general_surgery | 3 |
| H626 | general_surgery | 3 |
| H662 | general_surgery | 3 |
| J021 | general_surgery | 5 |
| J022 | general_surgery | 5 |
| J023 | general_surgery | 5 |
| J024 | general_surgery | 5 |
| J032 | general_surgery | 5 |
| J082 | general_surgery | 3 |

|      |                 |   |
|------|-----------------|---|
| J091 | general_surgery | 3 |
| J101 | general_surgery | 3 |
| J103 | general_surgery | 3 |
| J117 | general_surgery | 3 |
| J121 | general_surgery | 5 |
| J123 | general_surgery | 4 |
| J124 | general_surgery | 4 |
| J131 | general_surgery | 4 |
| J132 | general_surgery | 4 |
| J141 | general_surgery | 4 |
| J168 | general_surgery | 5 |
| J182 | general_surgery | 4 |
| J183 | general_surgery | 4 |
| J185 | general_surgery | 4 |
| J188 | general_surgery | 4 |
| J189 | general_surgery | 4 |
| J192 | general_surgery | 4 |
| J193 | general_surgery | 4 |
| J211 | general_surgery | 4 |
| J212 | general_surgery | 4 |
| J241 | general_surgery | 4 |
| J292 | general_surgery | 4 |
| J305 | general_surgery | 4 |
| J381 | general_surgery | 3 |
| J382 | general_surgery | 3 |
| J388 | general_surgery | 3 |
| J389 | general_surgery | 3 |
| J398 | general_surgery | 3 |
| J401 | general_surgery | 3 |
| J402 | general_surgery | 3 |
| J403 | general_surgery | 3 |
| J404 | general_surgery | 3 |
| J406 | general_surgery | 3 |
| J408 | general_surgery | 3 |
| J411 | general_surgery | 3 |
| J412 | general_surgery | 3 |
| J413 | general_surgery | 3 |
| J421 | general_surgery | 3 |
| J428 | general_surgery | 3 |
| J431 | general_surgery | 3 |
| J433 | general_surgery | 3 |
| J438 | general_surgery | 3 |
| J439 | general_surgery | 3 |
| J449 | general_surgery | 3 |

|      |                 |   |
|------|-----------------|---|
| J462 | general_surgery | 3 |
| J471 | general_surgery | 3 |
| J475 | general_surgery | 3 |
| J478 | general_surgery | 3 |
| J502 | general_surgery | 3 |
| J562 | general_surgery | 5 |
| J563 | general_surgery | 5 |
| J571 | general_surgery | 5 |
| J575 | general_surgery | 5 |
| J578 | general_surgery | 5 |
| J594 | general_surgery | 5 |
| J611 | general_surgery | 5 |
| J614 | general_surgery | 5 |
| J619 | general_surgery | 5 |
| J662 | general_surgery | 4 |
| J664 | general_surgery | 4 |
| J671 | general_surgery | 4 |
| J673 | general_surgery | 4 |
| J678 | general_surgery | 4 |
| J692 | general_surgery | 4 |
| J749 | general_surgery | 2 |
| T202 | general_surgery | 2 |
| T203 | general_surgery | 2 |
| T204 | general_surgery | 2 |
| T208 | general_surgery | 2 |
| T209 | general_surgery | 2 |
| T212 | general_surgery | 2 |
| T213 | general_surgery | 2 |
| T219 | general_surgery | 2 |
| T223 | general_surgery | 2 |
| T242 | general_surgery | 2 |
| T243 | general_surgery | 2 |
| T248 | general_surgery | 2 |
| T249 | general_surgery | 2 |
| T251 | general_surgery | 2 |
| T252 | general_surgery | 2 |
| T253 | general_surgery | 2 |
| T258 | general_surgery | 2 |
| T259 | general_surgery | 2 |
| T262 | general_surgery | 2 |
| T271 | general_surgery | 2 |
| T272 | general_surgery | 2 |
| T273 | general_surgery | 2 |
| T283 | general_surgery | 2 |

|      |                 |   |
|------|-----------------|---|
| T288 | general_surgery | 2 |
| T301 | general_surgery | 5 |
| T302 | general_surgery | 4 |
| T309 | general_surgery | 4 |
| T313 | general_surgery | 2 |
| T315 | general_surgery | 2 |
| T331 | general_surgery | 3 |
| T343 | general_surgery | 4 |
| T348 | general_surgery | 4 |
| T361 | general_surgery | 5 |
| T364 | general_surgery | 4 |
| T391 | general_surgery | 4 |
| T411 | general_surgery | 3 |
| T412 | general_surgery | 3 |
| T413 | general_surgery | 3 |
| T419 | general_surgery | 3 |
| T423 | general_surgery | 3 |
| T431 | general_surgery | 3 |
| T432 | general_surgery | 3 |
| T439 | general_surgery | 3 |
| T451 | general_surgery | 3 |
| T452 | general_surgery | 3 |
| T453 | general_surgery | 3 |
| T454 | general_surgery | 3 |
| T458 | general_surgery | 3 |
| T463 | general_surgery | 3 |
| T468 | general_surgery | 3 |
| T469 | general_surgery | 3 |
| T483 | general_surgery | 3 |
| T851 | general_surgery | 2 |
| T852 | general_surgery | 2 |
| T855 | general_surgery | 2 |
| T858 | general_surgery | 2 |
| T861 | general_surgery | 2 |
| T862 | general_surgery | 2 |
| T867 | general_surgery | 2 |
| T868 | general_surgery | 2 |
| T872 | general_surgery | 2 |
| T873 | general_surgery | 2 |
| T875 | general_surgery | 2 |
| T877 | general_surgery | 2 |
| T878 | general_surgery | 2 |
| T879 | general_surgery | 2 |
| T911 | general_surgery | 2 |

|      |                     |   |
|------|---------------------|---|
| T929 | general_surgery     | 2 |
| T973 | general_surgery     | 2 |
| T982 | general_surgery     | 2 |
| M523 | Gynaecology_surgery | 3 |
| M533 | Gynaecology_surgery | 3 |
| M536 | Gynaecology_surgery | 3 |
| M538 | Gynaecology_surgery | 3 |
| M554 | Gynaecology_surgery | 3 |
| M563 | Gynaecology_surgery | 2 |
| P052 | Gynaecology_surgery | 2 |
| P054 | Gynaecology_surgery | 2 |
| P061 | Gynaecology_surgery | 2 |
| P063 | Gynaecology_surgery | 2 |
| P064 | Gynaecology_surgery | 2 |
| P091 | Gynaecology_surgery | 2 |
| P092 | Gynaecology_surgery | 2 |
| P131 | Gynaecology_surgery | 2 |
| P202 | Gynaecology_surgery | 3 |
| P205 | Gynaecology_surgery | 3 |
| P229 | Gynaecology_surgery | 3 |
| P231 | Gynaecology_surgery | 3 |
| P232 | Gynaecology_surgery | 3 |
| P233 | Gynaecology_surgery | 3 |
| P234 | Gynaecology_surgery | 3 |
| P237 | Gynaecology_surgery | 3 |
| P242 | Gynaecology_surgery | 3 |
| P247 | Gynaecology_surgery | 3 |
| P248 | Gynaecology_surgery | 3 |
| P255 | Gynaecology_surgery | 3 |
| P298 | Gynaecology_surgery | 3 |
| Q013 | Gynaecology_surgery | 1 |
| Q023 | Gynaecology_surgery | 1 |
| Q028 | Gynaecology_surgery | 1 |
| Q032 | Gynaecology_surgery | 1 |
| Q033 | Gynaecology_surgery | 1 |
| Q035 | Gynaecology_surgery | 1 |
| Q038 | Gynaecology_surgery | 1 |
| Q039 | Gynaecology_surgery | 1 |
| Q072 | Gynaecology_surgery | 3 |
| Q074 | Gynaecology_surgery | 3 |
| Q075 | Gynaecology_surgery | 3 |
| Q079 | Gynaecology_surgery | 3 |
| Q083 | Gynaecology_surgery | 3 |
| Q088 | Gynaecology_surgery | 3 |

|      |                           |   |   |
|------|---------------------------|---|---|
| Q089 | Gynaecology_surgery       | 3 |   |
| Q103 | Gynaecology_surgery       | 2 |   |
| Q113 | Gynaecology_surgery       | 2 |   |
| Q121 | Gynaecology_surgery       | 1 |   |
| Q151 | Gynaecology_surgery       | 3 |   |
| Q171 | Gynaecology_surgery       | 3 |   |
| Q174 | Gynaecology_surgery       | 3 |   |
| Q178 | Gynaecology_surgery       | 3 |   |
| Q181 | Gynaecology_surgery       | 3 |   |
| Q188 | Gynaecology_surgery       | 3 |   |
| Q189 | Gynaecology_surgery       | 3 |   |
| Q202 | Gynaecology_surgery       | 2 |   |
| Q221 | Gynaecology_surgery       | 3 |   |
| Q223 | Gynaecology_surgery       | 3 |   |
| Q228 | Gynaecology_surgery       | 3 |   |
| Q231 | Gynaecology_surgery       | 3 |   |
| Q235 | Gynaecology_surgery       | 3 |   |
| Q236 | Gynaecology_surgery       | 3 |   |
| Q241 | Gynaecology_surgery       | 3 |   |
| Q243 | Gynaecology_surgery       | 3 |   |
| Q352 | Gynaecology_surgery       | 2 |   |
| Q353 | Gynaecology_surgery       | 3 |   |
| Q432 | Gynaecology_surgery       | 3 |   |
| Q438 | Gynaecology_surgery       | 3 |   |
| Q472 | Gynaecology_surgery       | 3 |   |
| Q491 | Gynaecology_surgery       | 3 |   |
| Q552 | Gynaecology_surgery       | 1 |   |
| Q558 | Gynaecology_surgery       | 1 |   |
| Q559 | Gynaecology_surgery       | 1 |   |
| A021 | intracranial_neurosurgery |   | 5 |
| A022 | intracranial_neurosurgery |   | 5 |
| A023 | intracranial_neurosurgery |   | 5 |
| A024 | intracranial_neurosurgery |   | 5 |
| A028 | intracranial_neurosurgery |   | 5 |
| A029 | intracranial_neurosurgery |   | 5 |
| A038 | intracranial_neurosurgery |   | 5 |
| A039 | intracranial_neurosurgery |   | 5 |
| A041 | intracranial_neurosurgery |   | 4 |
| A042 | intracranial_neurosurgery |   | 5 |
| A054 | intracranial_neurosurgery |   | 5 |
| A081 | intracranial_neurosurgery |   | 4 |
| A083 | intracranial_neurosurgery |   | 4 |
| A086 | intracranial_neurosurgery |   | 4 |
| A089 | intracranial_neurosurgery |   | 4 |

|      |                           |   |
|------|---------------------------|---|
| A104 | intracranial_neurosurgery | 4 |
| A124 | intracranial_neurosurgery | 4 |
| A125 | intracranial_neurosurgery | 4 |
| A134 | intracranial_neurosurgery | 4 |
| A161 | intracranial_neurosurgery | 4 |
| A201 | intracranial_neurosurgery | 4 |
| A203 | intracranial_neurosurgery | 4 |
| A255 | intracranial_neurosurgery | 5 |
| A295 | intracranial_neurosurgery | 5 |
| A296 | intracranial_neurosurgery | 5 |
| A323 | intracranial_neurosurgery | 4 |
| A324 | intracranial_neurosurgery | 4 |
| A326 | intracranial_neurosurgery | 4 |
| A331 | intracranial_neurosurgery | 4 |
| A333 | intracranial_neurosurgery | 4 |
| A381 | intracranial_neurosurgery | 5 |
| A383 | intracranial_neurosurgery | 5 |
| A384 | intracranial_neurosurgery | 5 |
| A386 | intracranial_neurosurgery | 5 |
| A388 | intracranial_neurosurgery | 5 |
| A389 | intracranial_neurosurgery | 5 |
| A398 | intracranial_neurosurgery | 5 |
| A411 | intracranial_neurosurgery | 5 |
| B012 | intracranial_neurosurgery | 5 |
| B041 | intracranial_neurosurgery | 5 |
| L332 | intracranial_neurosurgery | 5 |
| L338 | intracranial_neurosurgery | 5 |
| L351 | intracranial_neurosurgery | 5 |
| L352 | intracranial_neurosurgery | 4 |
| O052 | intracranial_neurosurgery | 4 |
| V031 | intracranial_neurosurgery | 5 |
| V033 | intracranial_neurosurgery | 5 |
| V054 | intracranial_neurosurgery | 4 |
| V058 | intracranial_neurosurgery | 4 |
| V093 | intracranial_neurosurgery | 5 |
| O061 | Orthopedic                | 4 |
| O071 | Orthopedic                | 4 |
| O172 | Orthopedic                | 4 |
| O178 | Orthopedic                | 4 |
| O181 | Orthopedic                | 4 |
| O211 | Orthopedic                | 4 |
| O291 | Orthopedic                | 4 |
| R121 | Obstetric_surgery         | 4 |
| R151 | Obstetric_surgery         | 3 |



|      |                    |   |
|------|--------------------|---|
| R229 | Obstetric_surgery  | 3 |
| R323 | Obstetric_surgery  | 4 |
| C012 | ophthalmic_surgery | 2 |
| C013 | ophthalmic_surgery | 2 |
| C061 | ophthalmic_surgery | 2 |
| C063 | ophthalmic_surgery | 3 |
| C115 | ophthalmic_surgery | 4 |
| C121 | ophthalmic_surgery | 2 |
| C131 | ophthalmic_surgery | 2 |
| C132 | ophthalmic_surgery | 2 |
| C134 | ophthalmic_surgery | 2 |
| C142 | ophthalmic_surgery | 2 |
| C148 | ophthalmic_surgery | 2 |
| C152 | ophthalmic_surgery | 2 |
| C171 | ophthalmic_surgery | 2 |
| C253 | ophthalmic_surgery | 2 |
| C254 | ophthalmic_surgery | 3 |
| C321 | ophthalmic_surgery | 3 |
| C322 | ophthalmic_surgery | 3 |
| C411 | ophthalmic_surgery | 2 |
| C438 | ophthalmic_surgery | 2 |
| C441 | ophthalmic_surgery | 2 |
| C462 | ophthalmic_surgery | 2 |
| C463 | ophthalmic_surgery | 2 |
| C465 | ophthalmic_surgery | 2 |
| C543 | ophthalmic_surgery | 2 |
| C544 | ophthalmic_surgery | 2 |
| C545 | ophthalmic_surgery | 2 |
| C548 | ophthalmic_surgery | 2 |
| C549 | ophthalmic_surgery | 2 |
| C553 | ophthalmic_surgery | 2 |
| C578 | ophthalmic_surgery | 2 |
| C601 | ophthalmic_surgery | 2 |
| C605 | ophthalmic_surgery | 2 |
| C608 | ophthalmic_surgery | 2 |
| C612 | ophthalmic_surgery | 2 |
| C623 | ophthalmic_surgery | 2 |
| C678 | ophthalmic_surgery | 2 |
| C691 | ophthalmic_surgery | 2 |
| C694 | ophthalmic_surgery | 2 |
| C712 | ophthalmic_surgery | 2 |
| C719 | ophthalmic_surgery | 2 |
| C751 | ophthalmic_surgery | 2 |
| C791 | ophthalmic_surgery | 2 |

|      |                    |   |
|------|--------------------|---|
| C792 | ophthalmic_surgery | 2 |
| C793 | ophthalmic_surgery | 2 |
| C794 | ophthalmic_surgery | 2 |
| C795 | ophthalmic_surgery | 2 |
| C797 | ophthalmic_surgery | 2 |
| C798 | ophthalmic_surgery | 2 |
| C799 | ophthalmic_surgery | 2 |
| C801 | ophthalmic_surgery | 2 |
| C802 | ophthalmic_surgery | 2 |
| C803 | ophthalmic_surgery | 2 |
| C822 | ophthalmic_surgery | 2 |
| C823 | ophthalmic_surgery | 2 |
| C824 | ophthalmic_surgery | 2 |
| C828 | ophthalmic_surgery | 2 |
| C841 | ophthalmic_surgery | 2 |
| C848 | ophthalmic_surgery | 2 |
| T621 | Orthopedic         | 2 |
| T622 | Orthopedic         | 2 |
| T628 | Orthopedic         | 2 |
| T642 | Orthopedic         | 2 |
| T652 | Orthopedic         | 2 |
| T673 | Orthopedic         | 2 |
| T676 | Orthopedic         | 2 |
| T678 | Orthopedic         | 2 |
| T679 | Orthopedic         | 2 |
| T688 | Orthopedic         | 2 |
| T691 | Orthopedic         | 2 |
| T702 | Orthopedic         | 2 |
| T705 | Orthopedic         | 2 |
| T723 | Orthopedic         | 2 |
| T742 | Orthopedic         | 2 |
| T744 | Orthopedic         | 2 |
| T749 | Orthopedic         | 2 |
| T761 | Orthopedic         | 2 |
| T772 | Orthopedic         | 2 |
| T773 | Orthopedic         | 2 |
| T779 | Orthopedic         | 2 |
| T791 | Orthopedic         | 2 |
| T792 | Orthopedic         | 2 |
| T798 | Orthopedic         | 2 |
| T799 | Orthopedic         | 2 |
| T811 | Orthopedic         | 2 |
| T818 | Orthopedic         | 2 |
| W032 | Orthopedic         | 2 |

|      |            |   |           |
|------|------------|---|-----------|
| W035 | Orthopedic | 2 |           |
| W036 | Orthopedic | 2 |           |
| W038 | Orthopedic | 2 |           |
| W042 | Orthopedic | 2 |           |
| W043 | Orthopedic | 2 |           |
| W051 | Orthopedic | 2 |           |
| W059 | Orthopedic | 2 |           |
| W063 | Orthopedic | 2 |           |
| W066 | Orthopedic | 2 |           |
| W068 | Orthopedic | 2 |           |
| W069 | Orthopedic | 2 |           |
| W072 | Orthopedic | 2 |           |
| W082 | Orthopedic | 2 |           |
| W083 | Orthopedic | 2 |           |
| W085 | Orthopedic | 2 |           |
| W089 | Orthopedic | 2 |           |
| W091 | Orthopedic | 2 |           |
| W097 | Orthopedic | 2 |           |
| W102 | Orthopedic | 2 |           |
| W132 | Orthopedic | 2 |           |
| W133 | Orthopedic | 2 |           |
| W141 | Orthopedic | 2 |           |
| W146 | Orthopedic | 2 |           |
| W151 | Orthopedic | 2 |           |
| W152 | Orthopedic | 2 |           |
| W153 | Orthopedic | 2 |           |
| W156 | Orthopedic | 2 |           |
| W157 | Orthopedic | 2 |           |
| W158 | Orthopedic | 2 |           |
| W159 | Orthopedic | 2 |           |
| W164 | Orthopedic | 2 |           |
| W168 | Orthopedic | 2 |           |
| W169 | Orthopedic | 2 |           |
| W191 | Orthopedic | 4 | emergency |
| W192 | Orthopedic | 4 | emergency |
| W193 | Orthopedic | 4 | emergency |
| W194 | Orthopedic | 3 | emergency |
| W195 | Orthopedic | 3 | emergency |
| W196 | Orthopedic | 3 | emergency |
| W198 | Orthopedic | 3 | emergency |
| W199 | Orthopedic | 3 | emergency |
| W201 | Orthopedic | 4 | emergency |
| W202 | Orthopedic | 4 | emergency |
| W205 | Orthopedic | 3 | emergency |

|      |            |   |           |
|------|------------|---|-----------|
| W208 | Orthopedic | 3 | emergency |
| W209 | Orthopedic | 3 | emergency |
| W212 | Orthopedic | 3 | emergency |
| W214 | Orthopedic | 3 | emergency |
| W215 | Orthopedic | 3 | emergency |
| W222 | Orthopedic | 3 | emergency |
| W228 | Orthopedic | 3 | emergency |
| W229 | Orthopedic | 3 | emergency |
| W231 | Orthopedic | 3 | emergency |
| W232 | Orthopedic | 3 | emergency |
| W241 | Orthopedic | 4 | emergency |
| W242 | Orthopedic | 4 | emergency |
| W243 | Orthopedic | 4 | emergency |
| W244 | Orthopedic | 4 | emergency |
| W246 | Orthopedic | 3 | emergency |
| W248 | Orthopedic | 3 | emergency |
| W249 | Orthopedic | 3 | emergency |
| W251 | Orthopedic | 3 | emergency |
| W253 | Orthopedic | 3 | emergency |
| W259 | Orthopedic | 3 | emergency |
| W262 | Orthopedic | 3 | emergency |
| W264 | Orthopedic | 3 | emergency |
| W269 | Orthopedic | 3 | emergency |
| W281 | Orthopedic | 3 |           |
| W283 | Orthopedic | 3 |           |
| W291 | Orthopedic | 3 |           |
| W293 | Orthopedic | 3 |           |
| W299 | Orthopedic | 3 |           |
| W301 | Orthopedic | 3 |           |
| W303 | Orthopedic | 3 |           |
| W304 | Orthopedic | 3 |           |
| W332 | Orthopedic | 4 | emergency |
| W336 | Orthopedic | 3 |           |
| W361 | Orthopedic | 2 |           |
| W362 | Orthopedic | 2 |           |
| W371 | Orthopedic | 4 |           |
| W372 | Orthopedic | 4 |           |
| W373 | Orthopedic | 4 |           |
| W374 | Orthopedic | 4 |           |
| W378 | Orthopedic | 4 |           |
| W381 | Orthopedic | 4 |           |
| W382 | Orthopedic | 4 |           |
| W383 | Orthopedic | 4 |           |
| W384 | Orthopedic | 4 |           |

|      |            |   |
|------|------------|---|
| W391 | Orthopedic | 4 |
| W393 | Orthopedic | 4 |
| W394 | Orthopedic | 4 |
| W395 | Orthopedic | 4 |
| W396 | Orthopedic | 4 |
| W398 | Orthopedic | 4 |
| W399 | Orthopedic | 4 |
| W401 | Orthopedic | 4 |
| W402 | Orthopedic | 4 |
| W403 | Orthopedic | 4 |
| W404 | Orthopedic | 4 |
| W408 | Orthopedic | 4 |
| W409 | Orthopedic | 4 |
| W411 | Orthopedic | 4 |
| W412 | Orthopedic | 4 |
| W414 | Orthopedic | 4 |
| W419 | Orthopedic | 4 |
| W421 | Orthopedic | 4 |
| W424 | Orthopedic | 4 |
| W425 | Orthopedic | 4 |
| W426 | Orthopedic | 4 |
| W429 | Orthopedic | 4 |
| W431 | Orthopedic | 4 |
| W441 | Orthopedic | 4 |
| W442 | Orthopedic | 4 |
| W451 | Orthopedic | 4 |
| W453 | Orthopedic | 4 |
| W454 | Orthopedic | 4 |
| W461 | Orthopedic | 4 |
| W471 | Orthopedic | 4 |
| W481 | Orthopedic | 4 |
| W484 | Orthopedic | 4 |
| W485 | Orthopedic | 4 |
| W491 | Orthopedic | 3 |
| W501 | Orthopedic | 3 |
| W504 | Orthopedic | 3 |
| W511 | Orthopedic | 3 |
| W515 | Orthopedic | 3 |
| W521 | Orthopedic | 3 |
| W523 | Orthopedic | 3 |
| W531 | Orthopedic | 3 |
| W541 | Orthopedic | 3 |
| W542 | Orthopedic | 3 |
| W543 | Orthopedic | 3 |

|      |            |   |           |
|------|------------|---|-----------|
| W544 | Orthopedic | 3 |           |
| W551 | Orthopedic | 3 |           |
| W562 | Orthopedic | 3 |           |
| W571 | Orthopedic | 3 |           |
| W572 | Orthopedic | 3 |           |
| W581 | Orthopedic | 4 |           |
| W582 | Orthopedic | 4 |           |
| W589 | Orthopedic | 4 |           |
| W591 | Orthopedic | 2 |           |
| W593 | Orthopedic | 2 |           |
| W595 | Orthopedic | 2 |           |
| W596 | Orthopedic | 2 |           |
| W598 | Orthopedic | 2 |           |
| W601 | Orthopedic | 3 |           |
| W611 | Orthopedic | 3 |           |
| W621 | Orthopedic | 3 |           |
| W622 | Orthopedic | 3 |           |
| W629 | Orthopedic | 3 |           |
| W652 | Orthopedic | 4 | emergency |
| W654 | Orthopedic | 4 | emergency |
| W659 | Orthopedic | 4 | emergency |
| W663 | Orthopedic | 4 | emergency |
| W664 | Orthopedic | 4 | emergency |
| W668 | Orthopedic | 4 | emergency |
| W669 | Orthopedic | 4 | emergency |
| W673 | Orthopedic | 4 | emergency |
| W676 | Orthopedic | 4 | emergency |
| W677 | Orthopedic | 4 | emergency |
| W693 | Orthopedic | 4 |           |
| W702 | Orthopedic | 3 |           |
| W712 | Orthopedic | 3 |           |
| W742 | Orthopedic | 3 |           |
| W752 | Orthopedic | 3 |           |
| W758 | Orthopedic | 3 |           |
| W778 | Orthopedic | 3 |           |
| W779 | Orthopedic | 3 |           |
| W781 | Orthopedic | 3 |           |
| W788 | Orthopedic | 3 |           |
| W791 | Orthopedic | 3 |           |
| W792 | Orthopedic | 3 |           |
| W802 | Orthopedic | 3 |           |
| W803 | Orthopedic | 3 |           |
| W811 | Orthopedic | 3 |           |
| W818 | Orthopedic | 3 |           |

|      |            |   |
|------|------------|---|
| W822 | Orthopedic | 2 |
| W823 | Orthopedic | 2 |
| W828 | Orthopedic | 2 |
| W829 | Orthopedic | 2 |
| W833 | Orthopedic | 2 |
| W835 | Orthopedic | 2 |
| W838 | Orthopedic | 2 |
| W844 | Orthopedic | 2 |
| W848 | Orthopedic | 2 |
| W851 | Orthopedic | 2 |
| W852 | Orthopedic | 2 |
| W858 | Orthopedic | 2 |
| W868 | Orthopedic | 2 |
| W871 | Orthopedic | 2 |
| W879 | Orthopedic | 2 |
| W889 | Orthopedic | 2 |
| W901 | Orthopedic | 2 |
| W902 | Orthopedic | 2 |
| W903 | Orthopedic | 2 |
| W911 | Orthopedic | 2 |
| W913 | Orthopedic | 2 |
| W918 | Orthopedic | 2 |
| W919 | Orthopedic | 2 |
| W921 | Orthopedic | 2 |
| W924 | Orthopedic | 2 |
| W931 | Orthopedic | 4 |
| W941 | Orthopedic | 4 |
| W942 | Orthopedic | 4 |
| W943 | Orthopedic | 4 |
| W951 | Orthopedic | 4 |
| W953 | Orthopedic | 4 |
| W961 | Orthopedic | 4 |
| W963 | Orthopedic | 4 |
| W965 | Orthopedic | 4 |
| W966 | Orthopedic | 4 |
| W971 | Orthopedic | 4 |
| W972 | Orthopedic | 4 |
| W975 | Orthopedic | 4 |
| W981 | Orthopedic | 4 |
| W986 | Orthopedic | 4 |
| X082 | Orthopedic | 3 |
| X083 | Orthopedic | 3 |
| X084 | Orthopedic | 3 |
| X142 | Orthopedic | 5 |

|      |            |   |   |
|------|------------|---|---|
| X143 | Orthopedic |   | 5 |
| X148 | Orthopedic |   | 5 |
| X203 | Orthopedic |   | 3 |
| S012 | Plastic    | 2 |   |
| S049 | Plastic    | 1 |   |
| S055 | Plastic    | 1 |   |
| S065 | Plastic    | 1 |   |
| S067 | Plastic    | 1 |   |
| S068 | Plastic    | 1 |   |
| S069 | Plastic    | 1 |   |
| S131 | Plastic    | 1 |   |
| S132 | Plastic    | 1 |   |
| S142 | Plastic    | 1 |   |
| S152 | Plastic    | 1 |   |
| S159 | Plastic    | 1 |   |
| S238 | Plastic    | 3 |   |
| S249 | Plastic    | 3 |   |
| S279 | Plastic    | 3 |   |
| S314 | Plastic    | 3 |   |
| S351 | Plastic    | 3 |   |
| S352 | Plastic    | 3 |   |
| S353 | Plastic    | 3 |   |
| S358 | Plastic    | 3 |   |
| S359 | Plastic    | 3 |   |
| S379 | Plastic    | 3 |   |
| S404 | Plastic    | 3 |   |
| S411 | Plastic    | 1 |   |
| S418 | Plastic    | 1 |   |
| S421 | Plastic    | 1 |   |
| S423 | Plastic    | 1 |   |
| S424 | Plastic    | 1 |   |
| S433 | Plastic    | 1 |   |
| S454 | Plastic    | 1 |   |
| S456 | Plastic    | 1 |   |
| S471 | Plastic    | 1 |   |
| S472 | Plastic    | 1 |   |
| S474 | Plastic    | 1 |   |
| S476 | Plastic    | 1 |   |
| S504 | Plastic    | 1 |   |
| S538 | Plastic    | 1 |   |
| S551 | Plastic    | 3 |   |
| S561 | Plastic    | 3 |   |
| S563 | Plastic    | 2 |   |
| S564 | Plastic    | 1 |   |



|      |                     |   |  |
|------|---------------------|---|--|
| S569 | Plastic             | 3 |  |
| S571 | Plastic             | 2 |  |
| S573 | Plastic             | 1 |  |
| S574 | Plastic             | 1 |  |
| S575 | Plastic             | 1 |  |
| S578 | Plastic             | 1 |  |
| S582 | Plastic             | 1 |  |
| S604 | Plastic             | 1 |  |
| S608 | Plastic             | 1 |  |
| S641 | Plastic             | 1 |  |
| S662 | Plastic             | 1 |  |
| S681 | Plastic             | 1 |  |
| T521 | Plastic             | 1 |  |
| T525 | Plastic             | 1 |  |
| T529 | Plastic             | 1 |  |
| T541 | Plastic             | 1 |  |
| T561 | Plastic             | 1 |  |
| T591 | Plastic             | 1 |  |
| T592 | Plastic             | 1 |  |
| T598 | Plastic             | 1 |  |
| T962 | Plastic             | 2 |  |
| T968 | Plastic             | 2 |  |
| V011 | Plastic             | 3 |  |
| V082 | Plastic             | 3 |  |
| V092 | Plastic             | 2 |  |
| V143 | Plastic             | 2 |  |
| V144 | Plastic             | 2 |  |
| V152 | Plastic             | 2 |  |
| V198 | Plastic             | 2 |  |
| M011 | Renal_tract_surgery | 4 |  |
| M013 | Renal_tract_surgery | 4 |  |
| M015 | Renal_tract_surgery | 4 |  |
| M019 | Renal_tract_surgery | 4 |  |
| M021 | Renal_tract_surgery | 4 |  |
| M022 | Renal_tract_surgery | 4 |  |
| M025 | Renal_tract_surgery | 4 |  |
| M029 | Renal_tract_surgery | 4 |  |
| M039 | Renal_tract_surgery | 4 |  |
| M051 | Renal_tract_surgery | 4 |  |
| M062 | Renal_tract_surgery | 4 |  |
| M064 | Renal_tract_surgery | 3 |  |
| M093 | Renal_tract_surgery | 2 |  |
| M094 | Renal_tract_surgery | 2 |  |
| M119 | Renal_tract_surgery | 3 |  |

|      |                     |   |
|------|---------------------|---|
| M131 | Renal_tract_surgery | 3 |
| M132 | Renal_tract_surgery | 3 |
| M135 | Renal_tract_surgery | 2 |
| M136 | Renal_tract_surgery | 3 |
| M137 | Renal_tract_surgery | 4 |
| M138 | Renal_tract_surgery | 4 |
| M141 | Renal_tract_surgery | 2 |
| M164 | Renal_tract_surgery | 3 |
| M165 | Renal_tract_surgery | 2 |
| M181 | Renal_tract_surgery | 4 |
| M193 | Renal_tract_surgery | 4 |
| M195 | Renal_tract_surgery | 3 |
| M198 | Renal_tract_surgery | 3 |
| M212 | Renal_tract_surgery | 4 |
| M253 | Renal_tract_surgery | 2 |
| M271 | Renal_tract_surgery | 2 |
| M272 | Renal_tract_surgery | 2 |
| M273 | Renal_tract_surgery | 2 |
| M274 | Renal_tract_surgery | 3 |
| M275 | Renal_tract_surgery | 3 |
| M278 | Renal_tract_surgery | 3 |
| M281 | Renal_tract_surgery | 2 |
| M282 | Renal_tract_surgery | 2 |
| M283 | Renal_tract_surgery | 2 |
| M288 | Renal_tract_surgery | 2 |
| M292 | Renal_tract_surgery | 2 |
| M293 | Renal_tract_surgery | 2 |
| M295 | Renal_tract_surgery | 2 |
| M298 | Renal_tract_surgery | 2 |
| M301 | Renal_tract_surgery | 2 |
| M302 | Renal_tract_surgery | 2 |
| M309 | Renal_tract_surgery | 2 |
| M311 | Renal_tract_surgery | 2 |
| M318 | Renal_tract_surgery | 2 |
| M326 | Renal_tract_surgery | 2 |
| M332 | Renal_tract_surgery | 3 |
| M334 | Renal_tract_surgery | 3 |
| M335 | Renal_tract_surgery | 3 |
| M341 | Renal_tract_surgery | 5 |
| M342 | Renal_tract_surgery | 5 |
| M343 | Renal_tract_surgery | 5 |
| M348 | Renal_tract_surgery | 5 |
| M351 | Renal_tract_surgery | 4 |
| M375 | Renal_tract_surgery | 4 |

|      |                     |   |
|------|---------------------|---|
| M378 | Renal_tract_surgery | 4 |
| M382 | Renal_tract_surgery | 3 |
| M391 | Renal_tract_surgery | 4 |
| M418 | Renal_tract_surgery | 4 |
| M421 | Renal_tract_surgery | 3 |
| M422 | Renal_tract_surgery | 3 |
| M423 | Renal_tract_surgery | 3 |
| M432 | Renal_tract_surgery | 3 |
| M441 | Renal_tract_surgery | 3 |
| M442 | Renal_tract_surgery | 3 |
| M443 | Renal_tract_surgery | 3 |
| M444 | Renal_tract_surgery | 3 |
| M448 | Renal_tract_surgery | 2 |
| M451 | Renal_tract_surgery | 2 |
| M452 | Renal_tract_surgery | 2 |
| M453 | Renal_tract_surgery | 2 |
| M455 | Renal_tract_surgery | 2 |
| M459 | Renal_tract_surgery | 2 |
| M471 | Renal_tract_surgery | 1 |
| M472 | Renal_tract_surgery | 1 |
| M473 | Renal_tract_surgery | 1 |
| M478 | Renal_tract_surgery | 1 |
| M479 | Renal_tract_surgery | 1 |
| M492 | Renal_tract_surgery | 2 |
| M493 | Renal_tract_surgery | 2 |
| M494 | Renal_tract_surgery | 2 |
| M495 | Renal_tract_surgery | 2 |
| M496 | Renal_tract_surgery | 1 |
| M498 | Renal_tract_surgery | 2 |
| M611 | Renal_tract_surgery | 4 |
| M612 | Renal_tract_surgery | 4 |
| M614 | Renal_tract_surgery | 4 |
| M618 | Renal_tract_surgery | 5 |
| M619 | Renal_tract_surgery | 5 |
| M642 | Renal_tract_surgery | 4 |
| M647 | Renal_tract_surgery | 3 |
| M648 | Renal_tract_surgery | 4 |
| M651 | Renal_tract_surgery | 4 |
| M653 | Renal_tract_surgery | 4 |
| M654 | Renal_tract_surgery | 4 |
| M655 | Renal_tract_surgery | 4 |
| M658 | Renal_tract_surgery | 3 |
| M659 | Renal_tract_surgery | 3 |
| M662 | Renal_tract_surgery | 3 |

|      |                     |   |
|------|---------------------|---|
| M668 | Renal_tract_surgery | 3 |
| M672 | Renal_tract_surgery | 3 |
| M676 | Renal_tract_surgery | 3 |
| M678 | Renal_tract_surgery | 4 |
| M702 | Renal_tract_surgery | 2 |
| M703 | Renal_tract_surgery | 2 |
| M706 | Renal_tract_surgery | 3 |
| M708 | Renal_tract_surgery | 3 |
| M711 | Renal_tract_surgery | 3 |
| M712 | Renal_tract_surgery | 3 |
| M722 | Renal_tract_surgery | 3 |
| M736 | Renal_tract_surgery | 3 |
| M761 | Renal_tract_surgery | 3 |
| M763 | Renal_tract_surgery | 3 |
| M764 | Renal_tract_surgery | 3 |
| M766 | Renal_tract_surgery | 3 |
| M792 | Renal_tract_surgery | 3 |
| M793 | Renal_tract_surgery | 2 |
| M814 | Renal_tract_surgery | 2 |
| M851 | Renal_tract_surgery | 2 |
| M868 | Renal_tract_surgery | 2 |
| N012 | Renal_tract_surgery | 2 |
| N051 | Renal_tract_surgery | 3 |
| N063 | Renal_tract_surgery | 3 |
| N068 | Renal_tract_surgery | 3 |
| N071 | Renal_tract_surgery | 3 |
| N111 | Renal_tract_surgery | 2 |
| N113 | Renal_tract_surgery | 2 |
| N114 | Renal_tract_surgery | 2 |
| N118 | Renal_tract_surgery | 2 |
| N132 | Renal_tract_surgery | 2 |
| N153 | Renal_tract_surgery | 2 |
| N171 | Renal_tract_surgery | 1 |
| N201 | Renal_tract_surgery | 2 |
| N262 | Renal_tract_surgery | 3 |
| N271 | Renal_tract_surgery | 3 |
| N282 | Renal_tract_surgery | 2 |
| N283 | Renal_tract_surgery | 2 |
| N289 | Renal_tract_surgery | 2 |
| N291 | Renal_tract_surgery | 2 |
| N292 | Renal_tract_surgery | 3 |
| N303 | Renal_tract_surgery | 2 |
| N304 | Renal_tract_surgery | 2 |
| N325 | Renal_tract_surgery | 2 |

|      |                         |   |   |
|------|-------------------------|---|---|
| X451 | Renal_tract_surgery     | 4 |   |
| A442 | spinalcord_neurosurgery |   | 5 |
| A448 | spinalcord_neurosurgery |   | 5 |
| A481 | spinalcord_neurosurgery |   | 5 |
| A521 | spinalcord_neurosurgery |   | 5 |
| A522 | spinalcord_neurosurgery |   | 3 |
| A552 | spinalcord_neurosurgery |   | 3 |
| V221 | spine_neurosurgery      | 4 |   |
| V222 | spine_neurosurgery      | 4 |   |
| V223 | spine_neurosurgery      | 4 |   |
| V228 | spine_neurosurgery      | 4 |   |
| V233 | spine_neurosurgery      | 4 |   |
| V241 | spine_neurosurgery      | 5 |   |
| V242 | spine_neurosurgery      | 5 |   |
| V248 | spine_neurosurgery      | 5 |   |
| V251 | spine_neurosurgery      | 4 |   |
| V252 | spine_neurosurgery      | 4 |   |
| V253 | spine_neurosurgery      | 4 |   |
| V254 | spine_neurosurgery      | 4 |   |
| V255 | spine_neurosurgery      | 4 |   |
| V258 | spine_neurosurgery      | 4 |   |
| V259 | spine_neurosurgery      | 4 |   |
| V264 | spine_neurosurgery      | 4 |   |
| V281 | spine_neurosurgery      | 4 |   |
| V291 | spine_neurosurgery      | 4 |   |
| V294 | spine_neurosurgery      | 4 |   |
| V299 | spine_neurosurgery      | 4 |   |
| V319 | spine_neurosurgery      | 4 |   |
| V331 | spine_neurosurgery      | 4 |   |
| V332 | spine_neurosurgery      | 4 |   |
| V337 | spine_neurosurgery      | 4 |   |
| V375 | spine_neurosurgery      | 5 |   |
| V382 | spine_neurosurgery      | 4 |   |
| V383 | spine_neurosurgery      | 4 |   |
| V385 | spine_neurosurgery      | 4 |   |
| V386 | spine_neurosurgery      | 4 |   |
| V388 | spine_neurosurgery      | 4 |   |
| V404 | spine_neurosurgery      | 4 |   |
| V411 | spine_neurosurgery      | 4 |   |
| V423 | spine_neurosurgery      | 4 |   |
| V444 | spine_neurosurgery      | 4 |   |
| V445 | spine_neurosurgery      | 5 |   |
| V452 | spine_neurosurgery      | 5 |   |
| V461 | spine_neurosurgery      | 4 |   |

|      |                    |   |
|------|--------------------|---|
| V462 | spine_neurosurgery | 4 |
| V468 | spine_neurosurgery | 4 |
| V473 | spine_neurosurgery | 3 |
| V499 | spine_neurosurgery | 4 |
| V528 | spine_neurosurgery | 4 |
| V544 | spine_neurosurgery | 2 |
| V671 | spine_neurosurgery | 4 |
| V672 | spine_neurosurgery | 4 |
| E485 | Thoracic           | 2 |
| E486 | Thoracic           | 2 |
| E488 | Thoracic           | 2 |
| E489 | Thoracic           | 2 |
| E491 | Thoracic           | 2 |
| E492 | Thoracic           | 2 |
| E495 | Thoracic           | 2 |
| E498 | Thoracic           | 2 |
| E499 | Thoracic           | 2 |
| E503 | Thoracic           | 4 |
| E506 | Thoracic           | 4 |
| E511 | Thoracic           | 4 |
| E518 | Thoracic           | 4 |
| E519 | Thoracic           | 4 |
| E538 | Thoracic           | 5 |
| E541 | Thoracic           | 5 |
| E543 | Thoracic           | 5 |
| E544 | Thoracic           | 5 |
| E545 | Thoracic           | 5 |
| E548 | Thoracic           | 5 |
| E551 | Thoracic           | 5 |
| E552 | Thoracic           | 5 |
| E578 | Thoracic           | 5 |
| E591 | Thoracic           | 5 |
| E593 | Thoracic           | 5 |
| E595 | Thoracic           | 5 |
| E598 | Thoracic           | 5 |
| E611 | Thoracic           | 5 |
| E621 | Thoracic           | 5 |
| E631 | Thoracic           | 5 |
| E639 | Thoracic           | 4 |
| T013 | Thoracic           | 4 |
| T018 | Thoracic           | 4 |
| T028 | Thoracic           | 4 |
| T033 | Thoracic           | 4 |
| T034 | Thoracic           | 4 |

|      |                       |   |
|------|-----------------------|---|
| T038 | Thoracic              | 4 |
| T039 | Thoracic              | 4 |
| T053 | Thoracic              | 4 |
| T054 | Thoracic              | 3 |
| T058 | Thoracic              | 4 |
| T071 | Thoracic              | 5 |
| T072 | Thoracic              | 5 |
| T088 | Thoracic              | 5 |
| T092 | Thoracic              | 4 |
| T094 | Thoracic              | 5 |
| T095 | Thoracic              | 5 |
| T102 | Thoracic              | 5 |
| T111 | Thoracic              | 4 |
| T112 | Thoracic              | 4 |
| T119 | Thoracic              | 4 |
| T121 | Thoracic              | 4 |
| T122 | Thoracic              | 4 |
| T123 | Thoracic              | 4 |
| T124 | Thoracic              | 3 |
| T129 | Thoracic              | 3 |
| T131 | Thoracic              | 4 |
| T141 | Thoracic              | 3 |
| X558 | unspecified_surgery   |   |
| L393 | Vascular_intervention | 4 |
| L394 | Vascular_intervention | 3 |
| L431 | Vascular_intervention | 3 |
| L434 | Vascular_intervention | 3 |
| L472 | Vascular_intervention | 4 |
| L473 | Vascular_intervention | 4 |
| L541 | Vascular_intervention | 4 |
| L544 | Vascular_intervention | 4 |
| L631 | Vascular_intervention | 4 |
| L632 | Vascular_intervention | 4 |
| L633 | Vascular_intervention | 4 |
| L634 | Vascular_intervention | 4 |
| L635 | Vascular_intervention | 4 |
| L665 | Vascular_intervention | 4 |
| L667 | Vascular_intervention | 4 |
| L671 | Vascular_intervention | 3 |
| L713 | Vascular_intervention | 4 |
| L718 | Vascular_intervention | 4 |
| L721 | Vascular_intervention | 4 |
| L726 | Vascular_intervention | 2 |
| L728 | Vascular_intervention | 4 |

|      |                       |   |           |
|------|-----------------------|---|-----------|
| O011 | Vascular_intervention | 3 |           |
| O031 | Vascular_intervention | 3 |           |
| O041 | Vascular_intervention | 3 |           |
| L184 | Vascular_surgery      | 5 |           |
| L194 | Vascular_surgery      | 5 |           |
| L195 | Vascular_surgery      | 5 |           |
| L196 | Vascular_surgery      | 5 |           |
| L198 | Vascular_surgery      | 5 |           |
| L199 | Vascular_surgery      | 5 |           |
| L216 | Vascular_surgery      | 5 |           |
| L236 | Vascular_surgery      | 5 |           |
| L238 | Vascular_surgery      | 5 |           |
| L271 | Vascular_surgery      | 5 |           |
| L274 | Vascular_surgery      | 5 |           |
| L276 | Vascular_surgery      | 5 |           |
| L279 | Vascular_surgery      | 5 |           |
| L281 | Vascular_surgery      | 5 |           |
| L294 | Vascular_surgery      | 5 |           |
| L295 | Vascular_surgery      | 5 |           |
| L301 | Vascular_surgery      | 5 |           |
| L302 | Vascular_surgery      | 5 |           |
| L303 | Vascular_surgery      | 5 |           |
| L312 | Vascular_surgery      | 4 |           |
| L451 | Vascular_surgery      | 5 |           |
| L514 | Vascular_surgery      | 5 |           |
| L571 | Vascular_surgery      | 5 |           |
| L572 | Vascular_surgery      | 5 |           |
| L575 | Vascular_surgery      | 5 |           |
| L579 | Vascular_surgery      | 5 |           |
| L583 | Vascular_surgery      | 5 | emergency |
| L591 | Vascular_surgery      | 5 |           |
| L592 | Vascular_surgery      | 5 |           |
| L593 | Vascular_surgery      | 5 |           |
| L595 | Vascular_surgery      | 5 |           |
| L601 | Vascular_surgery      | 5 |           |
| L602 | Vascular_surgery      | 5 |           |
| L603 | Vascular_surgery      | 5 |           |
| L608 | Vascular_surgery      | 5 |           |
| L621 | Vascular_surgery      | 5 |           |
| L622 | Vascular_surgery      | 5 |           |
| L701 | Vascular_surgery      | 5 |           |
| L703 | Vascular_surgery      | 4 |           |
| L711 | Vascular_surgery      | 5 |           |
| L742 | Vascular_surgery      | 4 |           |



|      |                  |   |
|------|------------------|---|
| L743 | Vascular_surgery | 4 |
| L745 | Vascular_surgery | 4 |
| L746 | Vascular_surgery | 4 |
| L752 | Vascular_surgery | 4 |
| L791 | Vascular_surgery | 4 |
| L841 | Vascular_surgery | 2 |
| L842 | Vascular_surgery | 2 |
| L844 | Vascular_surgery | 2 |
| L851 | Vascular_surgery | 2 |
| L852 | Vascular_surgery | 2 |
| L853 | Vascular_surgery | 2 |
| L859 | Vascular_surgery | 2 |
| L871 | Vascular_surgery | 2 |
| L872 | Vascular_surgery | 2 |
| L873 | Vascular_surgery | 2 |
| L874 | Vascular_surgery | 2 |
| L881 | Vascular_surgery | 2 |
| L882 | Vascular_surgery | 2 |
| L918 | Vascular_surgery | 2 |
| L942 | Vascular_surgery | 2 |
| L943 | Vascular_surgery | 2 |
| L951 | Vascular_surgery | 2 |
| L959 | Vascular_surgery | 2 |
| L974 | Vascular_surgery | 2 |
| X093 | Vascular_Surgery | 4 |
| X095 | Vascular_Surgery | 4 |
| X108 | Vascular_Surgery | 3 |
| X111 | Vascular_Surgery | 3 |
| X112 | Vascular_Surgery | 3 |
| X118 | Vascular_Surgery | 3 |
| X119 | Vascular_Surgery | 3 |
| X121 | Vascular_Surgery | 4 |
| X123 | Vascular_Surgery | 4 |
